# Supplementary material for: The emerging chemical patterns applied in predicting human toll-like receptor 8 agonists
Source: Royal Society of Chemistry journal article supplement (doi:10.1039/c8md00276b), 2018-01-01
Supplement: c8md00276b1.pdf [file c8md00276b1.pdf]

## Supplementary materials

### **The Emerging Chemical Patterns Applied in Predicting Human Toll-Like Receptor 8 Agonists**

Shuheng Huang<sup>1,2</sup>, Hu Mei<sup>1,2,\*</sup>, Duo Zhang<sup>2</sup>, Yubin Ren<sup>2</sup>, MuliadiYeremia Kevin<sup>2</sup>,  
Xianchao Pan<sup>2,3,\*</sup>

<sup>1</sup>Key Laboratory of Biorheological Science and Technology (Ministry of Education),  
Chongqing University, Chongqing 400044, China

<sup>2</sup>College of Bioengineering, Chongqing University, Chongqing 400044, China

<sup>3</sup>Department of Medicinal Chemistry, College of Pharmacy, Southwest Medical  
University, Luzhou, Sichuan 646000, China

#### **Corresponding Author:**

\*Hu Mei, E-mail address: [meihu@cqu.edu.cn](mailto:meihu@cqu.edu.cn)

\*Xianchao Pan; E-mail address: [panxc@swmu.edu.cn](mailto:panxc@swmu.edu.cn)

## Table of contents

|           | Contents                                                                                   | Page  |
|-----------|--------------------------------------------------------------------------------------------|-------|
| Table S1. | The information of 286 samples                                                             | S3-10 |
| Table S2  | The performances of step-wise linear discriminant analysis on 132 training samples         | S11   |
| Table S3  | The performance comparison between SVM and ECP models                                      | S12   |
| Table S4  | The results of 30 repeated ECP modeling                                                    | S13   |
| Table S5  | The 13 ECPs discovered from the non-agonists of TLR8 (ECPG2)                               | S14   |
| Table S6  | The prediction results of 46 TLR8 agonists collected from the most recent published papers | S15   |
| Table S7  | The prediction performances of the ECP-Surflex model                                       | S16   |

**Table S1.**

The information of 286 samples

| AID <sup>a</sup> | Serial Number <sup>b</sup> | SID <sup>c</sup> | Smile Structure                                                       | Activity | EC50 (μM) |
|------------------|----------------------------|------------------|-----------------------------------------------------------------------|----------|-----------|
| 766330           | 70001                      | 174498091        | <chem>o3c1c(c2c(nc1N)cccc2)cc3C</chem>                                | Active   |           |
|                  | 70002                      | 174498092        | <chem>o3c1c(c2c(nc1N)cccc2)cc3CCC</chem>                              | Active   |           |
|                  | 70003                      | 174498093        | <chem>o3c1c(c2c(nc1N)cccc2)cc3CCCCC</chem>                            | Active   |           |
|                  | 70004                      | 174503346        | <chem>o3c1c(c2c(nc1N)cccc2)cc3CCCCC</chem>                            | Active   |           |
|                  | 70005                      | 174513636        | <chem>o1c2c(cc1CCCC)ccnc2N</chem>                                     | Active   | 46.2      |
|                  | 70006                      | 174523914        | <chem>o1c2c(cc1CCC)ccnc2N</chem>                                      | Active   | 24.4      |
|                  | 70007                      | 174523915        | <chem>o3c1c(c2c(nc1N)cccc2)cc3</chem>                                 | Inactive |           |
| 766334           | 70008                      | 174487933        | <chem>o3c1c(c2c(nc1N)cccc2)cc3CCCO</chem>                             | Active   |           |
|                  | 70009                      | 174487934        | <chem>o3c1c(c2c(nc1N)cccc2)cc3CCOCC</chem>                            | Active   |           |
|                  | 70010                      | 174487935        | <chem>o3c1c(c(nc2cccc21)N)cc3CCCC</chem>                              | Active   |           |
|                  | 70011                      | 174492975        | <chem>o3c1c(c2c(nc1N)cccc2)cc3C4CC4</chem>                            | Active   |           |
|                  | 70012                      | 174492976        | <chem>o3c1c(c2c(nc1N)cccc2)cc3CC4CCCCC4</chem>                        | Active   |           |
|                  | 70013                      | 174492977        | <chem>o3c1c(c2c(nc1N)cccc2)cc3CC[NH3+]</chem>                         | Active   |           |
|                  | 70014                      | 174498061        | <chem>o3c2nc(c1c(ccc1)e2cc3CCCC)N</chem>                              | Inactive |           |
|                  | 70015                      | 174498088        | <chem>o3c1c(c2c(nc1N)cccc2)cc3Cc4cccc4</chem>                         | Active   |           |
|                  | 70016                      | 174498089        | <chem>o3c1c(c2c(nc1N)cccc2)cc3CO</chem>                               | Active   |           |
|                  | 70017                      | 174498090        | <chem>o3c1c(c2c(nc1N)cccc2)cc3CCCCO</chem>                            | Active   |           |
|                  | 70018                      | 174498094        | <chem>o3c1c(c2c(nc1N)cccc2)cc3C(C)(C)C</chem>                         | Active   |           |
|                  | 70019                      | 174503345        | <chem>o3c1c(c2c(nc1N)cccc2)cc3CCO</chem>                              | Active   |           |
|                  | 70020                      | 174508536        | <chem>o3c1c(c2c(nc1N)cccc2)cc3-c4cccc4</chem>                         | Active   |           |
|                  | 70021                      | 174513657        | <chem>o3c1c(c2c(nc1N)cccc2)cc3C4CCCC4</chem>                          | Active   |           |
|                  | 70022                      | 174513658        | <chem>o3c1c(c2c(nc1N)cccc2)cc3CC4CCCC4</chem>                         | Active   |           |
|                  | 70023                      | 174513659        | <chem>o3c1c(c2c(nc1N)cccc2)cc3CC(O)C</chem>                           | Active   |           |
|                  | 70024                      | 174518672        | <chem>o3c1c(c2c(nc1N)cccc2)cc3CCC(C)C</chem>                          | Active   |           |
|                  | 70025                      | 174518695        | <chem>o3c1c(c2c(nc1N)cccc2)cc3C(O)(C)C</chem>                         | Active   |           |
|                  | 70026                      | 174523911        | <chem>o3c1c(c2c(nc1N)cccc2)cc3C(O)CC(C)C</chem>                       | Active   |           |
|                  | 70027                      | 174523912        | <chem>o3c1c(c2c(nc1N)cccc2)cc3C[NH3+]</chem>                          | Active   |           |
|                  | 70028                      | 174523917        | <chem>o3c1c(c2c(nc1N)cccc2)cc3CC(C)C</chem>                           | Active   |           |
| 474846           | 70029                      | 103746829        | <chem>O=C2N(c1nc(nc1N2)N)OCCCC)C3cc(ccc3)CC(=O)OC</chem>              | Inactive |           |
| 1138188          | 70030                      | 242634216        | <chem>O4C(C2C(C(c1cc(c(c1)OC)OC)OC)C2C)e5c(nc3c(ccc3)c54O)(C)C</chem> | Inactive |           |
| 706910           | 70031                      | 136937159        | <chem>n21c(c(nc1nc2)-c3cccc3)[NH2+][C(C)(C)C</chem>                   | Inactive |           |
|                  | 70032                      | 163312889        | <chem>n21c(c(nc1nc2)-c3cccc3)[NH2+][Cc4cccc4</chem>                   | Inactive |           |
|                  | 70033                      | 163314443        | <chem>O(c1ccc(cc1)Nc2n3c(nc2CCCC)c(ncc3)N)C</chem>                    | Inactive |           |
|                  | 70034                      | 163314444        | <chem>[O-]c1c(ccc1)-c3nc2n(ccn2)c3[NH2+][C4CCCCC4</chem>              | Inactive |           |
|                  | 70035                      | 163317909        | <chem>n21c(c(nc1cccc2)-c3ccncc3)[NH2+][C4CCCCC4</chem>                | Inactive |           |

|        |       |           |                                                                                               |          |       |
|--------|-------|-----------|-----------------------------------------------------------------------------------------------|----------|-------|
|        | 70036 | 163319732 | <chem>n21c(c(nc1cccc2)-c3cccc3)[NH2+]C(C)(C)C</chem>                                          | Inactive |       |
|        | 70037 | 163319733 | <chem>n21c(c(nc1cccc2)-c3cccc3)[NH2+]Cc4cccc4</chem>                                          | Inactive |       |
|        | 70038 | 163321381 | <chem>n21c(c(nc1c(cc2)N)-c3cccc3)[NH2+]C4CCCC4</chem>                                         | Inactive |       |
|        | 70039 | 163326567 | <chem>n21c(c(nc1cccc2)-c3cccc3)[NH2+]C4CCCC4</chem>                                           | Inactive |       |
|        | 70040 | 163328162 | <chem>n31c(nc(c1[NH2+]Cc2cccc2)CCCC)c(cc3)N</chem>                                            | Inactive |       |
|        | 70041 | 163328163 | <chem>n21c(c(nc1cccc2)-c3cccc3)[NH2+]Cc4cccc4</chem>                                          | Inactive |       |
|        | 70042 | 163328164 | <chem>[O-]c1c(ccc1)-c3nc2n(ccc2)c3[NH2+]Cc4cccc4</chem>                                       | Inactive |       |
|        | 70043 | 163331739 | <chem>n21c(c(nc1cccc2)-c3cccc3)[NH2+]C(C)(C)C</chem>                                          | Inactive |       |
|        | 70044 | 163331740 | <chem>[O-]c1c(ccc1)-c3nc2n(ccc2)c3[NH2+]Cc4cccc4</chem>                                       | Inactive |       |
|        | 70045 | 163335187 | <chem>n21c(c(nc1c(cc2)N)-c3ccc(cc3)-c4cccc4)[NH2+]C5CCCC5</chem>                              | Inactive |       |
|        | 70046 | 163335188 | <chem>n21c(c(nc1cccc2)-c3cccc3)[NH2+]C(C)(C)C</chem>                                          | Inactive |       |
|        | 70047 | 163335189 | <chem>n21c(c(nc1cccc2)-c3cccc3)[NH2+]C4CCCC4</chem>                                           | Inactive |       |
|        | 70048 | 163335190 | <chem>n21c(c(nc1cccc2)-c3cccc3)[NH2+]Cc4cccc4</chem>                                          | Inactive |       |
|        | 70049 | 163335191 | <chem>Oc1c(ccc1)-c3nc2n(ccc2)c3[NH2+]C(C)(C)C</chem>                                          | Inactive |       |
|        | 70050 | 163338585 | <chem>Oc1c(ccc1)-c3nc2n(ccc2)c3[NH2+]C(C)(C)C</chem>                                          | Inactive |       |
| 706908 | 70051 | 103602263 | <chem>s1c2c(nc1CCC)c(nc3cccc32)N</chem>                                                       | Active   | 1.32  |
|        | 70052 | 163314442 | <chem>o1c6c(c(c1[NH2+]CCCC[NH2+]c3oc2c(c(cnc2C)CO)c3Nc4cccc4)Nc5nc<br/>ccc5)c(cnc6C)CO</chem> | Active   | 3.37  |
|        | 70053 | 163317906 | <chem>o1c3c(c(c1[NH3+])Nc2cccc2)c(cnc3C)CO</chem>                                             | Inactive |       |
|        | 70054 | 163317907 | <chem>o1c4c(c(c1[NH2+]C2CCCC2)Nc3cccc3)c(cnc4C)CO</chem>                                      | Active   | 6.93  |
|        | 70055 | 163317908 | <chem>P(=O)(OCC)(OCC)C[NH2+]c2oc1c(c(cnc1C)CO)c2Nc3cccc3</chem>                               | Inactive |       |
|        | 70056 | 163317910 | <chem>o1c3c(c(c1[NH2+]C(C)(C)C)Nc2cccc2)c(cnc3C)CO</chem>                                     | Inactive |       |
|        | 70057 | 163321377 | <chem>o1c3c(c(c1NC(C)(C)C)Nc2cccc2)c(cnc3C)CO</chem>                                          | Inactive |       |
|        | 70058 | 163321378 | <chem>o1c4c(c(c1[NH2+]C2CCCC2)Nc3cccc3)c(cnc4C)CO</chem>                                      | Active   | 10.58 |
|        | 70059 | 163321379 | <chem>o1c3c(c(c1[NH2+]CCC(=O)OC(C)(C)C)Nc2cccc2)c(cnc3C)CO</chem>                             | Active   | 7.64  |
|        | 70060 | 163321380 | <chem>o1c4c(c(c1Nc2ccc(cc2)OC)Nc3cccc3)c(cnc4C)CO</chem>                                      | Inactive |       |
|        | 70061 | 163324730 | <chem>o1c3c(c(c1[NH2+]CCCC)Nc2cc(ccc2)[N+](=O)[O-])c(cnc3C)CO</chem>                          | Active   | 0.85  |
|        | 70062 | 163324731 | <chem>o1c4c(c(c1[NH2+]Cc2cccc2)Nc3cccc3)c(cnc4C)CO</chem>                                     | Inactive |       |
|        | 70063 | 163324732 | <chem>o1c4c(c(c1[NH2+]CCN2CCOCC2)Nc3cccc3)c(cnc4C)CO</chem>                                   | Inactive |       |
|        | 70064 | 163328159 | <chem>o1c4c(c(c1[NH2+]Cc2cccc2)Nc3cccc3)c(cnc4C)CO</chem>                                     | Active   | 9.79  |
|        | 70065 | 163328160 | <chem>O(c1c(c(cnc1C)CO)-c3nc2n(ccc2)c3[NH2+]C4CCCC4)Cc5cccc5</chem>                           | Inactive |       |
|        | 70066 | 163328161 | <chem>[Si](C[NH2+]c2oc1c(c(cnc1C)CO)c2Nc3cccc3)(C)(C)C</chem>                                 | Inactive |       |
|        | 70067 | 163331734 | <chem>o1c3c(c(c1[NH2+]CCCC)Nc2cccc2)c(cnc3C)CO</chem>                                         | Active   | 2.25  |
|        | 70068 | 163331735 | <chem>o1c3c(c(c1[NH2+]CCCC)Nc2cccc2)c(cnc3C)CO</chem>                                         | Inactive |       |
|        | 70069 | 163331736 | <chem>o1c3c(c(c1[NH2+]C(C)C)Nc2cccc2)c(cnc3C)CO</chem>                                        | Inactive |       |
|        | 70070 | 163331737 | <chem>o1c3c(c(c1[NH2+]C(CCC)C)Nc2cccc2)c(cnc3C)CO</chem>                                      | Active   | 9.01  |
|        | 70071 | 163331738 | <chem>Clc1c(c(ccc1)C)Nc3oc2c(c(c[nH+]c2C)CO)c3Nc4cccc4</chem>                                 | Inactive |       |
|        | 70072 | 163335186 | <chem>o1c4c(c(c1[NH2+]Cc2cccc2)Nc3cccc3)c(cnc4C)CO</chem>                                     | Active   | 1.68  |
|        | 70073 | 163338580 | <chem>Fc1cc(ccc1)Nc2c3c(oc2[NH2+]CCCC)c([nH+]cc3CO)C</chem>                                   | Active   | 0.37  |
|        | 70074 | 163338581 | <chem>o1c3c(c(c1[NH2+]CCCC)Nc2cccc2)c(cnc3C)CO</chem>                                         | Inactive |       |

|        |           |                                                        |                                                                         |          |      |
|--------|-----------|--------------------------------------------------------|-------------------------------------------------------------------------|----------|------|
|        | 70075     | 163338582                                              | <chem>o1c3c(c(e1NC(CC(C)(C)C)(C)C)Nc2[nH+]c3ccc2)c(c[nH+]c3C)CO</chem>  | Inactive |      |
|        | 70076     | 163338583                                              | <chem>o1c3c(c(e1[NH2+]CC(=O)OCC)Nc2ncccc2)c(cnc3C)CO</chem>             | Inactive |      |
|        | 70077     | 163338584                                              | <chem>o1c4c(c(e1[NH2+]C(c2cccc2)C)Nc3ncccc3)c(cnc4C)CO</chem>           | Active   | 4.27 |
| 484312 | 70078     | 103758846                                              | <chem>OC(Cn1c2c(nc1CNCC)c(nc3cccc32)N)(C)C</chem>                       | Inactive |      |
|        | 70079     | 103758847                                              | <chem>OC(Cn1c2c(nc1C[NH+](CC)CC)c([nH+]c3cccc32)N)(C)C</chem>           | Inactive |      |
|        | 70080     | 103758910                                              | <chem>OC(Cn1c2c(nc1CN(C(=O)C)CC)c(nc3cccc32)N)(C)C</chem>               | Inactive |      |
|        | 70081     | 103758911                                              | <chem>OC(Cn1c2c(nc1CN(C(=O)CCCCCCCCCCCC)CC)c(nc3cccc32)N)(C)C</chem>    | Inactive |      |
|        | 70082     | 103758912                                              | <chem>OC(Cn1c2c(nc1CN(C(=[NH+]CC)NCCCN(C)C)CC)c(nc3cccc32)N)(C)C</chem> | Inactive |      |
|        | 70083     | 103758913                                              | <chem>OC(Cn1c2c(nc1C[NH+](CCOCCOCC[NH3+])CC)c(nc3cccc32)N)(C)C</chem>   | Inactive |      |
|        | 70084     | 103758978                                              | <chem>OC(Cn1c2c(nc1CN(CCC#N)CC)c([nH+]c3cccc32)N)(C)C</chem>            | Inactive |      |
|        | 70085     | 103758979                                              | <chem>OC(Cn1c2c(nc1C[NH+](CCC[NH3+])CC)c(nc3cccc32)N)(C)C</chem>        | Inactive |      |
|        | 70086     | 103758981                                              | <chem>OC(Cn1c2c(nc1CNCCCCCCCC)C)c(nc3cccc32)N)(C)C</chem>               | Inactive |      |
|        | 70087     | 103758982                                              | <chem>n1(c2c(nc1C)c(nc3cccc32)N)Cc4cccc4</chem>                         | Inactive |      |
|        | 70088     | 103758983                                              | <chem>n1(c2c(nc1CC)c([nH+]c3cccc32)N)Cc4cccc4</chem>                    | Inactive |      |
|        | 70089     | 103759059                                              | <chem>n1(c2c(nc1CCC)c([nH+]c3cccc32)N)Cc4cccc4</chem>                   | Inactive |      |
|        | 70090     | 103759060                                              | <chem>n1(c2c(nc1CCCC)c([nH+]c3cccc32)N)Cc4cccc4</chem>                  | Inactive |      |
|        | 70091     | 103759061                                              | <chem>n1(c2c(nc1CCCCC)c([nH+]c3cccc32)N)Cc4cccc4</chem>                 | Inactive |      |
|        | 70092     | 103759062                                              | <chem>n1(c2c(nc1CCCCC)c([nH+]c3cccc32)N)Cc4cccc4</chem>                 | Inactive |      |
|        | 70093     | 103759063                                              | <chem>n1(c2c(nc1CCCCC)c([nH+]c3cccc32)N)Cc4cccc4</chem>                 | Inactive |      |
|        | 70094     | 103759134                                              | <chem>n1(c2c(nc1CCCCCCCC)c([nH+]c3cccc32)N)Cc4cccc4</chem>              | Inactive |      |
|        | 70095     | 103759135                                              | <chem>n1(c2c(nc1CCCCCCCCC)c([nH+]c3cccc32)N)Cc4cccc4</chem>             | Inactive |      |
|        | 70096     | 103759136                                              | <chem>n1(c2c(nc1CCCCCCCCCCCC)C)c([nH+]c3cccc32)N)Cc4cccc4</chem>        | Inactive |      |
|        | 70097     | 103759137                                              | <chem>n1(c2c(nc1CCC=C)c([nH+]c3cccc32)N)Cc4cccc4</chem>                 | Inactive |      |
|        | 70098     | 103759209                                              | <chem>n1(c2c(nc1CCC#C)c([nH+]c3cccc32)N)Cc4cccc4</chem>                 | Inactive |      |
|        | 70099     | 103759210                                              | <chem>Clc1[nH+]c4c(c2n(c(nc21)CCCC)Cc3cccc3)cccc4</chem>                | Inactive |      |
|        | 70100     | 103759211                                              | <chem>O=C2Nc1c(cccc1)-c3n(c(nc32)CCCC)Cc4cccc4</chem>                   | Inactive |      |
|        | 70101     | 103759212                                              | <chem>n1(c2c(nc1CCCC)c([nH+]c3cccc32)-c4cccc4)Cc5cccc5</chem>           | Inactive |      |
|        | 70102     | 103759213                                              | <chem>ONc1[nH+]c4c(c2n(c(nc21)CCCC)Cc3cccc3)cccc4</chem>                | Inactive |      |
|        | 70103     | 103759285                                              | <chem>n1(c2c(nc1CCCC)c([nH+]c3cccc32)N[NH3+])Cc4cccc4</chem>            | Inactive |      |
|        | 70104     | 103759286                                              | <chem>n1(c2c(nc1CCCC)c([nH+]c3cccc32)Cc4cccc4</chem>                    | Inactive |      |
|        | 70105     | 103759287                                              | <chem>n1(c2c(nc1CNCC)c([nH+]c3cccc32)N)Cc4cccc4</chem>                  | Inactive |      |
| 70106  | 103759289 | <chem>Clc1nc4c(c2n(nc21)Cc3cccc3)cccc4</chem>          | Inactive                                                                |          |      |
| 70107  | 103759290 | <chem>n2(nc3c(nc1c(cccc1)c32)N)Cc4cccc4</chem>         | Inactive                                                                |          |      |
| 70108  | 103759372 | <chem>O=C3N(c1c(cnc2cccc21)N3C(=O)NCCC)Cc4cccc4</chem> | Inactive                                                                |          |      |
| 389403 | 70109     | 103647001                                              | <chem>O(C(=O)N2Cc1c(cccc1)N=C(N)C2)CC</chem>                            | Inactive | 100  |
|        | 70110     | 103647002                                              | <chem>O=C(N2Cc1c(cccc1)N=C(N)C2)N(CC)CC</chem>                          | Inactive | 100  |
| 719614 | 70111     | 103396795                                              | <chem>n1(c2c(nc1)c(nc3cccc32)N)CC(C)C</chem>                            | Inactive | 270  |
|        | 70112     | 103463768                                              | <chem>OC(Cn1c2c(nc1)c(nc3cccc32)N)(C)C</chem>                           | Inactive | 270  |
|        | 70113     | 103759288                                              | <chem>OC(Cn1c2c(nc1CCCC)c(nc3cccc32)N)(C)C</chem>                       | Active   | 0.1  |

|         |       |           |                                                                  |          |      |
|---------|-------|-----------|------------------------------------------------------------------|----------|------|
|         | 70114 | 163315609 | <chem>OC(Cn2c1c3c(nc(c1nc2)N)cc(cc3)C(=O)OC)(C)C</chem>          | Inactive | 270  |
|         | 70115 | 163315610 | <chem>OC(Cn1c2c(nc1CCCC)c(nc3cc(ccc32)C(=O)OC)N)(C)C</chem>      | Active   | 41.3 |
| 770386  | 70116 | 174508709 | <chem>O(c1nc2c(c(n1)N)NC(=O)CN2Cc3cc(ccc3)CN4CCCC4)CCCC</chem>   | Active   | 9    |
| 1068404 | 70117 | 103481674 | <chem>O(Cc3n(c1c(c(nc2ccccc21)N)n3)CC(O)(C)C)CC</chem>           | Active   | 4.5  |
|         | 70118 | 194146855 | <chem>O(C(=O)c3cc2nc(c1nc(n(c1c2cc3)CCOCc4ccccc4)CCCC)N)C</chem> | Active   | 31   |
|         | 70119 | 194146856 | <chem>OC(Cn1c2c([nH+]c1CC)c(nc3cc(ccc32)C(=O)OC)N)(C)C</chem>    | Inactive |      |
|         | 70120 | 194146857 | <chem>OC(Cn1c3c(nc1Cc2ccccc2)c(nc4cc(ccc43)C(=O)OC)N)(C)C</chem> | Inactive |      |
|         | 70121 | 194160693 | <chem>OC(Cn1c2c(nc1CCCC)c(nc3cc(ccc32)C(=O)OC)N)(C)C</chem>      | Active   | 7.2  |
|         | 70122 | 194167603 | <chem>O(C(=O)c3cc2nc(c1nc(n(c1c2cc3)CCOC)CCCC)N)C</chem>         | Inactive |      |
|         | 70123 | 194167604 | <chem>OC(Cn1c2c(nc1C)c(nc3cc(ccc32)C(=O)OC)N)(C)C</chem>         | Inactive |      |
|         | 70124 | 194167605 | <chem>O(C(=O)c3cc2nc(c1nc(n(c1c2cc3)CC(O)C)CCCC)N)C</chem>       | Active   | 1.5  |
|         | 70125 | 194181308 | <chem>OC(Cn1c2c(nc1CCC)c(nc3cc(ccc32)C(=O)OC)N)(C)C</chem>       | Inactive |      |
|         | 70126 | 194181309 | <chem>O(C(=O)c3cc2nc(c1nc(n(c1c2cc3)CCO)CCCC)N)C</chem>          | Active   | 4.4  |
| 1187004 | 90001 | 312355083 | <chem>c1cccc2c1NC(=[NH2+])C2CCCC</chem>                          | Inactive |      |
|         | 90002 | 312355084 | <chem>c1cccc2c1NC(=N)C2(CCCC)O</chem>                            | Inactive |      |
|         | 90003 | 194147973 | <chem>c1cccc2n(c(nc21)N)CCCC</chem>                              | Active   | 7.3  |
|         | 90004 | 312355085 | <chem>c1cccc2n(c(nc21)N)CCCCC</chem>                             | Active   | 3.23 |
|         | 90005 | 194157023 | <chem>c1cccc2n(c(nc21)N)CCCCCC</chem>                            | Active   | 3.96 |
|         | 90006 | 312355086 | <chem>c1cccc2n(c(nc21)N)Cc3ccccc3</chem>                         | Inactive |      |
|         | 90007 | 312368827 | <chem>c1cccc2n(c(nc21)N)Cc3ccccc3C[NH3+]</chem>                  | Inactive |      |
|         | 90008 | 312355087 | <chem>c1cccc2n(c(nc21)N)C(=O)OCCCC</chem>                        | Inactive |      |
|         | 90009 | 312355088 | <chem>c1cccc2n(c(nc21)NC(=O)C)CCCCC</chem>                       | Inactive |      |
|         | 90010 | 312355089 | <chem>c1cccc2cc3c(cc21)nc(n3CCCC)N</chem>                        | Inactive |      |
|         | 90011 | 312355090 | <chem>c1cc3c(c2n(c(nc21)N)CCCC)cccc3</chem>                      | Inactive |      |
|         | 90012 | 312355091 | <chem>c3ccc1c(ccc2n(c(nc21)N)CCCC)c3</chem>                      | Active   | 3.16 |
|         | 90013 | 312355092 | <chem>n1cccc2n(c(nc21)N)CCCCC</chem>                             | Inactive |      |
|         | 90014 | 312355093 | <chem>c1nccc2n(c(nc21)N)CCCCC</chem>                             | Inactive |      |
|         | 90015 | 312355094 | <chem>c1cncc2n(c(nc21)N)CCCCC</chem>                             | Inactive |      |
|         | 90016 | 312355095 | <chem>c1ccnc2n(c(nc21)N)CCCCC</chem>                             | Inactive |      |
|         | 90017 | 312355096 | <chem>c1(cccc2n(c(nc21)N)CCCC)C</chem>                           | Active   | 1.13 |
|         | 90018 | 312355097 | <chem>c1c(ccc2n(c(nc21)N)CCCC)C</chem>                           | Active   | 4.57 |
|         | 90019 | 312355098 | <chem>c1cc(cc2n(c(nc21)N)CCCC)C</chem>                           | Active   | 7.21 |
|         | 90020 | 312355099 | <chem>c1ccc(c2n(c(nc21)N)CCCC)C</chem>                           | Active   | 6.61 |
|         | 90021 | 312355100 | <chem>c1(cccc2n(c(nc21)N)CCCC)OC</chem>                          | Active   | 3.74 |
|         | 90022 | 312355101 | <chem>c1(cccc2n(c(nc21)N)CCCC)F</chem>                           | Inactive |      |
|         | 90023 | 312355102 | <chem>c1(cccc2n(c(nc21)N)CCCC)Cl</chem>                          | Inactive |      |
|         | 90024 | 312355103 | <chem>c1(cccc2n(c(nc21)N)CCCC)C(F)(F)F</chem>                    | Inactive |      |
|         | 90025 | 312355104 | <chem>c1(cccc2n(c(nc21)N)CCCC)Br</chem>                          | Inactive |      |
|         | 90026 | 312355105 | <chem>c1(cccc2n(c(nc21)N)CCCC)CC</chem>                          | Active   | 1.65 |

|  |       |           |                                                             |          |       |
|--|-------|-----------|-------------------------------------------------------------|----------|-------|
|  | 90027 | 312355106 | <chem>c1(cccc2n(c(nc21)N)CCCC)N(C)C</chem>                  | Active   | 7.12  |
|  | 90028 | 312355107 | <chem>c1(cccc2n(c(nc21)N)CCCC)-c3ccccc3</chem>              | Inactive |       |
|  | 90029 | 312355108 | <chem>c1(cccc2n(c(nc21)N)CCCC)Cc3ccccc3</chem>              | Inactive |       |
|  | 90030 | 312355109 | <chem>c1(cccc2n(c(nc21)N)CCCC)OCc3ccccc3</chem>             | Inactive |       |
|  | 90031 | 312355110 | <chem>c1(cccc2n(c(nc21)N)CCCC)[O-]</chem>                   | Active   | 5.01  |
|  | 90032 | 312355111 | <chem>c1(cccc2n(c(nc21)N)CCCC)[N+](=O)[O-]</chem>           | Inactive |       |
|  | 90033 | 312355112 | <chem>c1(cccc2n(c(nc21)N)CCCC)N</chem>                      | Active   | 6.6   |
|  | 90034 |           | <chem>c1cccc2c3c(c(nc21)N)oc(n3)CCCC</chem>                 | Active   |       |
|  | 90035 |           | <chem>c1cccc2n3c(c(nc21)N)nc(c3)CCCC</chem>                 | Active   | 3.05  |
|  | 90036 |           | <chem>c1cccc2c3c(c(nc21)N)oc(c3)CCCC</chem>                 | Active   |       |
|  | 90037 |           | <chem>c1cccc2c3c(c(nc21)N)cc(s3)CCCC</chem>                 | Active   |       |
|  | 90038 |           | <chem>c1cccc2c3c(c(nc21)N)cc([nH]3)CCCC</chem>              | Active   |       |
|  | 90039 |           | <chem>c1cccc2c3c(c(nc21)N)NN(CCCC)N3</chem>                 | Active   |       |
|  | 90040 |           | <chem>c1cccc2c3c(c(nc21)N)nc(s3)NCCC</chem>                 | Active   | 3.94  |
|  | 90041 |           | <chem>c1cccc2c3c(c(nc21)N)nc(o3)CCCC</chem>                 | Active   | 0.18  |
|  | 90042 |           | <chem>c1cccc2c3c(c(nc21)N)nc(s3)CCCC</chem>                 | Active   |       |
|  | 90043 |           | <chem>c1cccc2c3c(c(nc21)N)NN(CCCC)C3</chem>                 | Active   | 0.056 |
|  | 90044 |           | <chem>c1cccc2c3c(c(nc21)N)nc([nH]3)NCCC</chem>              | Active   |       |
|  | 90045 |           | <chem>c1cccc2c3c(c(nc21)N)sc(c3)CCCC</chem>                 | Active   |       |
|  | 90046 |           | <chem>c1cccc2c3c(c(nc21)N)nc([nH]3)CCCC</chem>              | Active   |       |
|  | 90047 |           | <chem>c1cccc2c3c(c(nc21)N)CC(=C3)CCCC</chem>                | Active   |       |
|  | 90048 |           | <chem>c1cccc2c3c(c(nc21)N)nc([nH]3)COCC</chem>              | Active   |       |
|  | 90049 |           | <chem>c1cccc2c1N=C(C3=NC(CCCC)CN32)N</chem>                 | Active   | 7.99  |
|  | 90050 |           | <chem>c1cccc2n3c(c(nc21)N)nc(n3)CCCC</chem>                 | Inactive |       |
|  | 90051 |           | <chem>c1cccc2c3c(c(nc21)N)nc(s3)NC(=O)CC</chem>             | Inactive |       |
|  | 90052 |           | <chem>c1cccc2n3c(c(nc21)N)nnc3CCCC</chem>                   | Inactive |       |
|  | 90053 |           | <chem>c1cccc2c3c(c(nc21)N)nc(o3)NCCC</chem>                 | Inactive |       |
|  | 90054 |           | <chem>c1cccc2c3n(c(nc21)N)nc(n3)CCCC</chem>                 | Inactive |       |
|  | 90055 |           | <chem>c1cccc2c3c(c(nc21)N)sc(n3)CCCC</chem>                 | Inactive |       |
|  | 90056 |           | <chem>c1cccc2c3n(c(nc21)N)cc(n3)CCCC</chem>                 | Inactive |       |
|  | 90057 |           | <chem>c1cccc2c3c(c(nc21)N)C=C(CCCC)C3</chem>                | Active   |       |
|  | 90058 |           | <chem>c1cccc2c3c(c(nc21)N)[nH]c(c3)CCCC</chem>              | Inactive |       |
|  | 90059 |           | <chem>c1cccc2c(c([nH+][c21]N)CCCC)Cc3cccc(c3)C[NH3+]</chem> | Active   | 0.15  |
|  | 90060 |           | <chem>c1cccc2c(c(nc21)N)CCCC)Cc3ccc(cc3)CN</chem>           | Active   | 0.12  |
|  | 90061 |           | <chem>c1cccc2c(c(nc21)N)CCCC)CCCC[NH3+]</chem>              | Active   | 0.19  |
|  | 90062 |           | <chem>c1cccc2c(c(nc21)N)CCCC)CCCC[NH3+]</chem>              | Active   | 0.25  |
|  | 90063 |           | <chem>c1ccc(c2cc(c(nc21)N)CCCC)Cc3cccc(c3)C#N</chem>        | Inactive |       |
|  | 90064 |           | <chem>c1ccc(c2cc(c(nc21)N)CCCC)Cc3cccc(c3)C[NH3+]</chem>    | Active   | 0.049 |
|  | 90065 |           | <chem>c1ccc(c2cc(c(nc21)N)CCCC)Cc3ccc(cc3)C#N</chem>        | Inactive |       |

|       |  |                                                              |          |       |
|-------|--|--------------------------------------------------------------|----------|-------|
| 90066 |  | <chem>c1ccc(c2cc(c(nc21)N)CCCC)Cc3ccc(cc3)C[NH3+]</chem>     | Active   | 0.038 |
| 90067 |  | <chem>c1ccc(c2cc(c(nc21)N)CCCC)Cc3cccc3C[NH3+]</chem>        | Active   | 1     |
| 90068 |  | <chem>c1ccc(c2cc(c(nc21)N)CCCC)Cc3cccc3</chem>               | Inactive |       |
| 90069 |  | <chem>c1ccc(c2cc(c([nH+]e21)N)CCCC)Cc3cccc(c3)C(=O)N</chem>  | Inactive |       |
| 90070 |  | <chem>c1ccc(c2cc(c(nc21)N)CCCC)-c3ccc(c3)C[NH3+]</chem>      | Inactive |       |
| 90071 |  | <chem>c1ccc(c2cc(c(nc21)N)CCCC)-c3ccc(cc3)C[NH3+]</chem>     | Active   | 0.699 |
| 90072 |  | <chem>c1ccc(c2cc(c(nc21)N)CCCC)CCC[NH3+]</chem>              | Active   | 0.091 |
| 90073 |  | <chem>c1ccc(c2cc(c(nc21)N)CCCC)CCCC[NH3+]</chem>             | Active   | 0.027 |
| 90074 |  | <chem>c1ccc(c2cc(c(nc21)N)CCCC)CCCC[NH3+]</chem>             | Active   | 0.009 |
| 90075 |  | <chem>c1ccc(c2cc(c(nc21)N)CCCC)CCCCC[NH3+]</chem>            | Active   | 0.056 |
| 90076 |  | <chem>c1ccc(c2cc(c(nc21)N)CCCC)CCCC(=O)N</chem>              | Active   | 2.181 |
| 90077 |  | <chem>c1ccc(c2cc(c(nc21)N)CCCC)CCCCNC(=N)N</chem>            | Active   | 2.862 |
| 90078 |  | <chem>c1cc(cc2cc(c(nc21)N)CCCC)CCCC[NH3+]</chem>             | Active   | 0.727 |
| 90079 |  | <chem>c1cc(cc2cc(c(nc21)N)CCCC)CCCC[NH3+]</chem>             | Active   | 0.519 |
| 90080 |  | <chem>c1cc(cc2cc(c(nc21)N)CCCC)CCCCC[NH3+]</chem>            | Active   | 1.016 |
| 90081 |  | <chem>c1c(ccc2cc(c(nc21)N)CCCC)CCCC[NH3+]</chem>             | Active   | 0.06  |
| 90082 |  | <chem>c1c(ccc2cc(c(nc21)N)CCCC)CCCC[NH3+]</chem>             | Active   | 0.05  |
| 90083 |  | <chem>c1c(ccc2cc(c(nc21)N)CCCC)CCCCC[NH3+]</chem>            | Active   | 0.085 |
| 90084 |  | <chem>c1(cccc2cc(c(nc21)N)CCCC)CCCC[NH3+]</chem>             | Inactive |       |
| 90085 |  | <chem>c1c(cc(c2cc(c(nc21)N)CCCC)CCCC[NH3+])CCCC[NH3+]</chem> | Active   | 0.621 |
| 80001 |  | <chem>c1nc(n(c1)CCCC)N</chem>                                | Active   | 28.4  |
| 80002 |  | <chem>c1nc(n(c1-c2cccc2)CCCC)N</chem>                        | Inactive |       |
| 80003 |  | <chem>c1(nc(n(c1-c2cccc2)CCCC)N)-c3cccc3</chem>              | Inactive |       |
| 80004 |  | <chem>c1(nc(n(c1)CCCC)N)-c2cccc2</chem>                      | Active   | 2.48  |
| 80005 |  | <chem>c1(nc(n(c1)CCCC)N)-c2c(ccc2)C</chem>                   | Active   | 2.5   |
| 80006 |  | <chem>c1(nc(n(c1)CCCC)N)-c2c(cccc2)CC</chem>                 | Active   | 2.5   |
| 80007 |  | <chem>c1(nc(n(c1)CCCC)N)-c2cc(ccc2)C</chem>                  | Active   | 2     |
| 80008 |  | <chem>c1(nc(n(c1)CCCC)N)-c2ccc(cc2)C</chem>                  | Active   | 2.5   |
| 80009 |  | <chem>c1(nc(n(c1)CCCC)N)-c2c(c(ccc2)C)C</chem>               | Active   | 1.5   |
| 80010 |  | <chem>c1(nc(n(c1)CCCC)N)-c2c(cc(cc2)C)C</chem>               | Active   | 1.5   |
| 80011 |  | <chem>c1(nc(n(c1)CCCC)N)-c2c(ccc(c2)C)C</chem>               | Active   | 1.5   |
| 80012 |  | <chem>c1(nc(n(c1)CCCC)N)-c2c(cccc2)C</chem>                  | Active   | 2.5   |
| 80013 |  | <chem>c1(nc(n(c1)CCCC)N)Cc2cccc2</chem>                      | Active   | 2.7   |
| 80014 |  | <chem>c1(nc(n(c1)CCCC)N)CCc2cccc2</chem>                     | Active   | 1.8   |
| 80015 |  | <chem>c1(nc(n(c1)CCCC)N)-c2c3c(ccc2)cccc3</chem>             | Active   | 1.5   |
| 80016 |  | <chem>c1(nc(n(c1)CCCC)N)-c2cc3c(cc2)cccc3</chem>             | Inactive |       |
| 80017 |  | <chem>c1(nc(n(c1)CCCC)N)-c2ccc(cc2)-c3cccc3</chem>           | Inactive |       |
| 80018 |  | <chem>c1(nc(n(c1)CCCC)N)-c2c(cccc2)OCc3cccc3</chem>          | Inactive |       |
| 80019 |  | <chem>c1(nc(n(c1)CCCC)N)-c2cnccc2</chem>                     | Active   | 21.31 |



|       |  |                                                      |          |       |
|-------|--|------------------------------------------------------|----------|-------|
| 80020 |  | <chem>c1(nc(n(c1)CCCC)N)-c2c(noc2)C</chem>           | Active   | 18.8  |
| 80021 |  | <chem>c1(nc(n(c1)CCCC)N)-c2c(ccc2)O</chem>           | Active   | 5.1   |
| 80022 |  | <chem>c1(nc(n(c1)CCCC)N)-c2c(ccc2)CO</chem>          | Active   | 8.05  |
| 80023 |  | <chem>c1(nc(n(c1)CCCC)N)-c2ccc(cc2)N</chem>          | Active   | 8     |
| 80024 |  | <chem>c1(nc(n(c1)CCCC)N)-c2ccc(cc2)C(=O)N</chem>     | Active   | 20.24 |
| 80025 |  | <chem>c1(nc(n(c1)CCCC)N)-c2ccc(cc2)C(=O)OC</chem>    | Active   | 4.04  |
| 80026 |  | <chem>c1(nc(n(c1)CCCC)N)-c2c(ccc2)C(=O)OC</chem>     | Active   | 11.1  |
| 80027 |  | <chem>c1(nc(n(c1)CCCC)N)-c2c(ccc2)OC</chem>          | Active   | 1.6   |
| 80028 |  | <chem>c1(nc(n(c1)CCCC)N)-c2cc(ccc2)OC</chem>         | Active   | 2.2   |
| 80029 |  | <chem>c1(nc(n(c1)CCCC)N)-c2ccc(cc2)OC</chem>         | Active   | 2.94  |
| 80030 |  | <chem>c1(nc(n(c1)CCCC)N)-c2c(cc(cc2)OC)C</chem>      | Active   | 1.5   |
| 80031 |  | <chem>c1(nc(n(c1)CCCC)N)-c2c(c(ccc2)C)OC</chem>      | Active   | 1.5   |
| 80032 |  | <chem>c1(nc(n(c1)CCCC)N)-c2c(c(ccc2)OC)OC</chem>     | Active   | 2.5   |
| 80033 |  | <chem>c1(nc(n(c1)CCCC)N)-c2cc(c(c(c2)OC)OC)OC</chem> | Active   | 3.08  |
| 80034 |  | <chem>c1(nc(n(c1)CCCC)N)-c2c(ccc2)Cl</chem>          | Active   | 1.36  |
| 80035 |  | <chem>c1(nc(n(c1)CCCC)N)-c2cc(ccc2)Cl</chem>         | Active   | 1.93  |
| 80036 |  | <chem>c1(nc(n(c1)CCCC)N)-c2ccc(cc2)Cl</chem>         | Active   | 6.83  |
| 80037 |  | <chem>c1(nc(n(c1)CCCC)N)-c2c(ccc2)F</chem>           | Active   | 2.35  |
| 80038 |  | <chem>c1(nc(n(c1)CCCC)N)-c2cc(ccc2)F</chem>          | Active   | 2.57  |
| 80039 |  | <chem>c1(nc(n(c1)CCCC)N)-c2ccc(cc2)F</chem>          | Active   | 1.96  |
| 80040 |  | <chem>c1(nc(n(c1)CCCC)N)-c2c(cc(cc2)F)C</chem>       | Active   | 2.01  |
| 80041 |  | <chem>c1(nc(n(c1)CCCC)N)-c2c(ccc2)C(F)(F)F</chem>    | Active   | 1.64  |
| 80042 |  | <chem>c1(nc(n(c1)CCCC)N)-c2cc(ccc2)C(F)(F)F</chem>   | Active   | 1.98  |
| 80043 |  | <chem>c1(nc(n(c1)CCCC)N)-c2ccc(cc2)C(F)(F)F</chem>   | Active   | 2.48  |
| 80044 |  | <chem>n1c(c(c(nc1N)NCCC)I)C</chem>                   | Inactive |       |
| 80045 |  | <chem>n1c(c(c(nc1N)NCCCC)I)C</chem>                  | Active   | 1.64  |
| 80046 |  | <chem>n1c(c(c(nc1N)NCCCC)I)C</chem>                  | Active   | 3.7   |
| 80047 |  | <chem>n1c(c(c(nc1N)NCCCC)I)C</chem>                  | Inactive |       |
| 80048 |  | <chem>n1c(c(c(nc1N)N(C)CCCC)I)C</chem>               | Inactive |       |
| 80049 |  | <chem>n1c(c(c(nc1N)N(Cc2cccc2)CCCC)I)C</chem>        | Inactive |       |
| 80050 |  | <chem>n1c(c(c(nc1N)OCCCC)I)C</chem>                  | Inactive |       |
| 80051 |  | <chem>n1c(c(c(nc1N)SCCCC)I)C</chem>                  | Inactive |       |
| 80052 |  | <chem>n1c(cc(nc1N)C#CCCC)C</chem>                    | Inactive |       |
| 80053 |  | <chem>n1c(cc(nc1N)CCCC)C</chem>                      | Inactive |       |
| 80054 |  | <chem>n1c(c(c(nc1N)CCCC)I)C</chem>                   | Inactive |       |
| 80055 |  | <chem>n1c(c(c(nc1N)NCCCC)Cl)C</chem>                 | Active   | 20    |
| 80056 |  | <chem>n1c(c(c(nc1N)NCCCC)Br)C</chem>                 | Active   | 8.5   |
| 80057 |  | <chem>n1c(c(c(nc1N)NCCCC)F)C</chem>                  | Active   | 34    |
| 80058 |  | <chem>n1c(cc(nc1N)NCCCC)C</chem>                     | Active   | 22    |

|       |  |                                               |          |      |
|-------|--|-----------------------------------------------|----------|------|
| 80059 |  | <chem>n1ccc(nc1N)NCCCC</chem>                 | Active   | 73.2 |
| 80060 |  | <chem>n1cc(c(nc1N)NCCCC)I</chem>              | Inactive |      |
| 80061 |  | <chem>n1c(cc(nc1N)NCCCC)N</chem>              | Inactive |      |
| 80062 |  | <chem>n1c(cc(nc1N)NCCCC)OC</chem>             | Inactive |      |
| 80063 |  | <chem>n1c(cc(nc1N)NCCCC)Cl</chem>             | Inactive |      |
| 80064 |  | <chem>n1c(c(c(nc1N)NCCCC)I)N</chem>           | Inactive |      |
| 80065 |  | <chem>n1c(c(c(nc1N)NCCCC)I)OC</chem>          | Inactive |      |
| 80066 |  | <chem>n1c(c(c(nc1N)NCCCC)I)Cl</chem>          | Inactive |      |
| 80067 |  | <chem>n1c(c(c(nc1N)NCCCC)C2CCCC2)C</chem>     | Active   | 1.2  |
| 80068 |  | <chem>n1c(c(c(nc1N)NCCCC)CCCN)C</chem>        | Active   | 2.31 |
| 80069 |  | <chem>n1c(c(c(nc1N)NCCCC)CCCN)C</chem>        | Active   | 0.3  |
| 80070 |  | <chem>n1c(c(c(nc1N)NCCCC)CCCN)C</chem>        | Active   | 0.3  |
| 80071 |  | <chem>n1c(cc(nc1N)NCCCC)-c2cccc2</chem>       | Active   | 6.7  |
| 80072 |  | <chem>n1c(c(c(nc1N)NCCCC)I)-c2cccc2</chem>    | Inactive |      |
| 80073 |  | <chem>n1c(c(c(nc1N)NCCCC)CCCN)-c2cccc2</chem> | Inactive |      |
| 80074 |  | <chem>n1c(c(c(nc1N)NCCCC)CCCN)-c2cccc2</chem> | Active   | 2.7  |
| 80075 |  | <chem>n1c(c(c(nc1N)NCCCC)CCCN)-c2cccc2</chem> | Active   | 2.35 |

<sup>a</sup> Pubmed BioAssay record ID (<https://pubchem.ncbi.nlm.nih.gov/#>)

<sup>b</sup> Assigned molecular serial number in this work

<sup>c</sup> PubChem Substance ID

**Table S2.**

The performances of step-wise linear discriminant analysis on 132 training samples

|    | Entered   | Removed   | R     | R Square | Adjusted R Square | Std. Error of the Estimate |
|----|-----------|-----------|-------|----------|-------------------|----------------------------|
| 1  | nN        |           | 0.422 | 0.178    | 0.171             | 0.911                      |
| 2  | fHpbVSA   |           | 0.519 | 0.270    | 0.258             | 0.862                      |
| 3  | BV12 -DRY |           | 0.563 | 0.318    | 0.302             | 0.837                      |
| 4  | BV12 -OH2 |           | 0.609 | 0.371    | 0.351             | 0.806                      |
| 5  | ID6 -DRY  |           | 0.622 | 0.386    | 0.362             | 0.800                      |
| 6  | mlogpUB   |           | 0.631 | 0.398    | 0.370             | 0.795                      |
| 7  | tAromVSA  |           | 0.642 | 0.412    | 0.378             | 0.789                      |
| 8  | HB7 -O    |           | 0.656 | 0.430    | 0.393             | 0.780                      |
| 9  | f-veVSA   |           | 0.669 | 0.447    | 0.407             | 0.771                      |
| 10 | BV11 -DRY |           | 0.678 | 0.459    | 0.414             | 0.766                      |
| 11 | D13-DRY   |           | 0.687 | 0.471    | 0.423             | 0.760                      |
| 12 | R-OH2     |           | 0.699 | 0.488    | 0.437             | 0.751                      |
| 13 | fHplVSA   |           | 0.706 | 0.499    | 0.444             | 0.746                      |
| 14 | Mv        |           | 0.715 | 0.511    | 0.453             | 0.741                      |
| 15 |           | nN        | 0.725 | 0.525    | 0.464             | 0.733                      |
| 16 | ID5 -DRY  |           | 0.724 | 0.524    | 0.467             | 0.731                      |
| 17 | W4        |           | 0.734 | 0.539    | 0.479             | 0.722                      |
| 18 |           | BV12 -OH2 | 0.733 | 0.537    | 0.482             | 0.720                      |
| 19 | ID7 -DRY  |           | 0.745 | 0.555    | 0.497             | 0.710                      |

**Table S3.**

The performance comparison between SVM and ECP models

| model | No. of descriptors | Training set(%) |      |      | Validation set(%) |      |      |
|-------|--------------------|-----------------|------|------|-------------------|------|------|
|       |                    | Acc             | Sen  | Spe  | Acc               | Sen  | Spe  |
| SVM   | 190                | 77.5            | 81.8 | 73.5 | 74.7              | 69.4 | 79.1 |
|       | 17                 | 77.3            | 77.0 | 77.4 | 72.2              | 61.1 | 81.4 |
|       | 10                 | 75.1            | 88.5 | 63.5 | 74.7              | 75.0 | 74.4 |
|       | 6                  | 77.5            | 81.8 | 73.5 | 74.7              | 69.4 | 79.1 |
| ECP   | 6 <sup>a</sup>     | 83.3            | 93.4 | 74.6 | 81.0              | 80.6 | 81.4 |

*a*: the best ECP model with 6 descriptors.

**Table S4.**

The results of 30 repeated ECP modeling

| model   | number of descriptors | number of ECPs | Training set(%) |             |             | Validation set(%) |             |             |
|---------|-----------------------|----------------|-----------------|-------------|-------------|-------------------|-------------|-------------|
|         |                       |                | Accuracy        | Sensitivity | Specificity | Accuracy          | Sensitivity | Specificity |
| 1       | 6                     | 28             | 84.1            | 83.6        | 84.5        | 79.7              | 75          | 83.7        |
| 2       |                       | 30             | 83.3            | 80.7        | 85.3        | 78.5              | 70          | 87.2        |
| 3       |                       | 34             | 86.4            | 88.5        | 84.5        | 75.9              | 72.2        | 79.1        |
| 4       |                       | 23             | 79.5            | 88.4        | 69.8        | 73.4              | 71.4        | 74.5        |
| 5       |                       | 27             | 86.4            | 79.6        | 91          | 77.2              | 79.1        | 75          |
| 6       |                       | 26             | 91              | 90.2        | 91.4        | 70.9              | 63          | 81.8        |
| 7       |                       | 26             | 81.8            | 85.7        | 78.3        | 73.4              | 76.5        | 71.1        |
| 8       |                       | 27             | 88.6            | 88.3        | 88.9        | 74.7              | 88.6        | 63.6        |
| 9       |                       | 26             | 81.1            | 88.9        | 75.6        | 78.5              | 79.1        | 77.8        |
| 10      |                       | 22             | 79.5            | 84.2        | 76          | 70.9              | 70          | 71.8        |
| 11      |                       | 33             | 90.9            | 90.2        | 91.4        | 75.9              | 72.2        | 79.1        |
| 12      |                       | 32             | 87.1            | 86.4        | 87.7        | 72.2              | 76.3        | 68.3        |
| 13      |                       | 25             | 83.3            | 83.1        | 83.6        | 73.4              | 71.4        | 75.7        |
| 14      |                       | 21             | 87.9            | 84.9        | 89.9        | 70.9              | 63          | 81.8        |
| 15      |                       | 32             | 87.1            | 88.1        | 86.3        | 83.5              | 87.9        | 80.4        |
| 16      |                       | 32             | 89.4            | 91.9        | 87.1        | 74.7              | 88.6        | 63.6        |
| 17      |                       | 24             | 85.6            | 83.1        | 87.7        | 78.5              | 78.9        | 78          |
| 18      |                       | 31             | 84.8            | 86.9        | 83.1        | 74.7              | 77.8        | 72.1        |
| 19      |                       | 15             | 85.6            | 82.7        | 87.5        | 73.4              | 76.5        | 71.1        |
| 20      |                       | 27             | 87.9            | 81.1        | 92.4        | 75.9              | 72.2        | 79.1        |
| 21      |                       | 31             | 88.6            | 88.3        | 88.9        | 74.7              | 81.1        | 69.1        |
| 22      |                       | 29             | 81.1            | 87.1        | 75.7        | 70.9              | 88.6        | 56.8        |
| 23      |                       | 24             | 85.6            | 86.4        | 84.9        | 75.9              | 78.9        | 73.2        |
| 24      |                       | 29             | 84.8            | 86.6        | 83.1        | 86.1              | 83.3        | 87.8        |
| 25      |                       | 22             | 83.3            | 87.5        | 79.4        | 83.5              | 87.9        | 80.4        |
| 26      |                       | 22             | 83.3            | 87.5        | 79.4        | 83.5              | 87.9        | 80.4        |
| 27      |                       | 25             | 83.3            | 93.5        | 74.3        | 77.2              | 77.1        | 77.3        |
| 28      |                       | 21             | 79.5            | 85.5        | 74.3        | 77.2              | 77.1        | 77.3        |
| 29      |                       | 26             | 86.4            | 92.7        | 81.8        | 73.4              | 71.4        | 75.7        |
| 30      |                       | 27             | 86.4            | 91.5        | 82.2        | 77.2              | 76.3        | 78          |
| Average |                       |                | 85.1            | 86.8        | 83.5        | 76.2              | 77.3        | 75.7        |
| Std Dev |                       |                | 3.2             | 3.5         | 6           | 4                 | 7.1         | 6.9         |

**Table S5.**

The 13 ECPs discovered from the non-agonists of TLR8 (ECPG2)

| Patterns | Class | Patterns Information                                                             | Growth Rate | Target-Class Support(%) | Rest Support(%) | Contribution |
|----------|-------|----------------------------------------------------------------------------------|-------------|-------------------------|-----------------|--------------|
| P15      | -1    | BV12-OH2>21.3<br>BV12-OH2≤24.8,<br>ID6-DRY≤81.2                                  | 6           | 19.7                    | 3.3             | 16.9         |
| P16      | -1    | BV12-OH2>23.6<br>BV12-OH2≤48<br>BV12-DRY≤32 ID6-<br>DRY>81.2<br>fHpbVSA_v1.0≤0.4 | 9.5         | 15.5                    | 1.7             | 14           |
| P17      | -1    | BV12-OH2>24.8<br>BV12-OH2≤45.7                                                   | infinity    | 23.9                    | 0               | 23.9         |
| P18      | -1    | BV12-OH2≤17.8                                                                    | 8.6         | 14.1                    | 1.6             | 12.6         |
| P19      | -1    | BV12-OH2≤23.6<br>BV12-DRY≤28.7<br>ID6-DRY>81.2<br>fHpbVSA_v1.0≤0.4               | infinity    | 18.3                    | 0               | 18.3         |
| P20      | -1    | BV12-OH2≤34.1<br>BV12-DRY≤40.8<br>mlogpUB_v1.0>7.5                               | infinity    | 47.9                    | 0               | 47.9         |
| P21      | -1    | BV12-OH2≤46.9<br>BV12-DRY≤28.7                                                   | 2.7         | 62                      | 23              | 45.2         |
| P22      | -1    | BV12-OH2≤48<br>BV12-DRY≤28.7<br>ID6-DRY>61.3<br>fHpbVSA_v1.0≤0.4                 | 3.4         | 39.4                    | 11.5            | 30.5         |
| P23      | -1    | BV12-OH2≤48<br>BV12-DRY≤28.7<br>nN_v1.0>3.5,<br>fHpbVSA_v1.0≤0.4                 | 9.5         | 31.0                    | 3.3             | 28.0         |
| P24      | -1    | BV12-OH2≤48<br>nN_v1.0>3.5,<br>fHpbVSA_v1.0≤0.4                                  | 2.3         | 45.1                    | 19.7            | 31.4         |
| P25      | -1    | BV12-DRY≤40.1<br>fHpbVSA_v1.0>0.4                                                | 7.2         | 35.2                    | 4.9             | 30.9         |
| P26      | -1    | nN_v1.0>3.5,<br>fHpbVSA_v1.0>0.4                                                 | infinity    | 23.9                    | 0               | 23.9         |
| P27      | -1    | mlogpUB_v1.0>7.5                                                                 | 2.6         | 69.0                    | 26.2            | 50.0         |

**Table S6.**

The prediction results of 46 TLR8 agonists collected from the most recent published papers

| Ref | Simile structures                                                             | Activity<br>( $\mu\text{M}$ ) | Label | Predicted<br>(ECP) | Predicted<br>(Surflex-dock) |
|-----|-------------------------------------------------------------------------------|-------------------------------|-------|--------------------|-----------------------------|
| 50  | <chem>N/C3=N/C1=CC=CC=C1C=2C=C(OC=23)CCCC</chem>                              | 1.6                           | 1     | 1                  | 1                           |
|     | <chem>N/C2=N/C1=CC=CC=C1/C=C2/CCCCC</chem>                                    | 0.2                           | 1     | 1                  | 1                           |
|     | <chem>N/C2=N/C1=CC=CC(CCCCCN)=C1/C=C2/CCCCC</chem>                            | 0.009                         | 1     | 1                  | 1                           |
|     | <chem>N/C2=N/C=1C(=CC=CC=1C)N2CCCCC</chem>                                    | 1.13                          | 1     | 1                  | 1                           |
| 51  | <chem>N/C2=N/C=1C=C(C=CC=1C3=C2/N=C(/CCCC)N3CC(C)(C)O)C(=O)OC</chem>          | 20.86                         | 1     | -1                 | -1                          |
|     | <chem>N/C2=N/C=1C=C(C=CC=1C3=C2/N=C(/CCCC)N3C[C@@](C)(O)[H])C(=O)OC</chem>    | 9.88                          | 1     | 1                  | -1                          |
|     | <chem>N/C2=N/C=1C=C(C=CC=1C3=C2/N=C(/CCCC)N3CCO)C(=O)OC</chem>                | 37                            | 1     | 1                  | 1                           |
|     | <chem>N/C2=N/C=1C=C(C=CC=1C3=C2/N=C(/CCCC)N3CCN)C(=O)OC</chem>                | 49.8                          | 1     | -1                 | -1                          |
|     | <chem>N/C2=N/C=1C=C(C=CC=1C3=C2/N=C(/CCCC)N3CCCN)C(=O)OC</chem>               | 26.7                          | 1     | 1                  | 1                           |
|     | <chem>N/C2=N/C=1C=C(C=CC=1C3=C2/N=C(/CCCC)N3CCCCN)C(=O)OC</chem>              | 3.85                          | 1     | 1                  | 1                           |
|     | <chem>N/C2=N/C=1C=C(C=CC=1C3=C2/N=C(/CCCC)N3CCCCCN)C(=O)OC</chem>             | 2.21                          | 1     | 1                  | -1                          |
|     | <chem>N/C2=N/C=1C=C(C=CC=1C3=C2/N=C(/CCCC)N3C/C4=C/C=C(C=C4)CN)C(=O)OC</chem> | 5.34                          | 1     | 1                  | 1                           |
| 52  | <chem>NC=2/N=C(/NC)C1=CC=CC=C1N=2</chem>                                      | 6.87                          | 1     | 1                  | 1                           |
|     | <chem>NC=2/N=C(/NCC)C1=CC=CC=C1N=2</chem>                                     | 0.77                          | 1     | 1                  | 1                           |
|     | <chem>NC=2/N=C(/NCCC)C1=CC=CC=C1N=2</chem>                                    | 0.93                          | 1     | 1                  | 1                           |
|     | <chem>NC=2/N=C(/NCCCC)C1=CC=CC=C1N=2</chem>                                   | 0.07                          | 1     | 1                  | 1                           |
|     | <chem>NC=2/N=C(/NCCCCC)C1=CC=CC=C1N=2</chem>                                  | 0.10                          | 1     | 1                  | 1                           |
|     | <chem>NC=2/N=C(/NCCC(C)(C)[H])C1=CC=CC=C1N=2</chem>                           | 2.11                          | 1     | 1                  | 1                           |
|     | <chem>NC=2/N=C(/N[C@@](C)([H])CCC)C1=CC=CC=C1N=2</chem>                       | 0.17                          | 1     | 1                  | 1                           |
|     | <chem>NC=2/N=C(/NCCCCOC)C1=CC=CC=C1N=2</chem>                                 | 0.01                          | 1     | 1                  | 1                           |
|     | <chem>NC=2/N=C(/NCCCC)C1=CC=CC([F])=C1N=2</chem>                              | 0.3                           | 1     | 1                  | 1                           |
|     | <chem>NC=2/N=C(/NCCCC)C1=CC=C(C=C1N=2)OC</chem>                               | 0.3                           | 1     | 1                  | 1                           |
|     | <chem>NC=2/N=C(/NCCCC)C1=CC=C(C=C1N=2)CO</chem>                               | 0.1                           | 1     | 1                  | 1                           |
|     | <chem>NC=2/N=C(/NCCCC)C1=CC=C(C=C1N=2)ON</chem>                               | 2.0                           | 1     | 1                  | 1                           |
|     | <chem>NC=2/N=C(/NCCCC)C1=CC=C(C=C1N=2)C(=O)N(C)C</chem>                       | 0.5                           | 1     | 1                  | 1                           |
|     | <chem>NC=2/N=C(/NCCCC)C1=CC=C(C=C1N=2)CN(C)C</chem>                           | 0.04                          | 1     | 1                  | 1                           |
|     | <chem>NC=2/N=C(/NCCCC)C1=CC([F])=CC=C1N=2</chem>                              | 0.1                           | 1     | 1                  | 1                           |
|     | <chem>NC=2/N=C(/NCCCC)C1=CC(=CC=C1N=2)OC</chem>                               | 1.8                           | 1     | -1                 | 1                           |
|     | <chem>NC=2/N=C(/NCCCC)C1=CC(=CC=C1N=2)CO</chem>                               | 0.2                           | 1     | 1                  | 1                           |
|     | <chem>NC=2/N=C(/NCCCC)C1=CC(=CC=C1N=2)C#N</chem>                              | 7.1                           | 1     | 1                  | 1                           |
|     | <chem>NC=2/N=C(/NCCCC)C1=CC(=CC=C1N=2)C(=O)C</chem>                           | 1.9                           | 1     | 1                  | 1                           |
|     | <chem>NC=2/N=C(/NCCCC)C1=CC(=CC=C1N=2)[C@@](C)(O)[H]</chem>                   | 5.8                           | 1     | -1                 | 1                           |
|     | <chem>NC=2/N=C(/NCCCC)C1=CC(=CC=C1N=2)CC/C3=C/C=C(C=C3)N(C)C</chem>           | 0.5                           | 1     | -1                 | 1                           |
|     | <chem>NC=2/N=C(/NCCCC)C1=CC(=CC=C1N=2)CC/C3=C/C=CC=N3</chem>                  | 0.3                           | 1     | -1                 | 1                           |
|     | <chem>NC=2/N=C(/NCCCC)C1=CC([F])=C([F])C=C1N=2</chem>                         | 0.1                           | 1     | 1                  | 1                           |

|                                                                    |       |   |    |    |
|--------------------------------------------------------------------|-------|---|----|----|
| <chem>NC=2/N=C(/NCCCC)C1=CC(OC)=C(C=C1N=2)OC</chem>                | 0.1   | 1 | 1  | 1  |
| <chem>NC=1/N=C(/NCCCC)C=2C(N=1)=CC=CC=2C</chem>                    | 0.3   | 1 | 1  | -1 |
| <chem>NC=1/N=C(/NCCCC)C=2C(N=1)=CC=CC=2OC</chem>                   | 0.1   | 1 | -1 | 1  |
| <chem>NC=1/N=C(/NCCCC)C=2C(N=1)=CC=CC=2CC/C3=C/C=CC=C3</chem>      | 0.47  | 1 | -1 | -1 |
| <chem>NC=1/N=C(/NCCCC)C=2C(N=1)=CC=CC=2OCCOC</chem>                | 0.2   | 1 | -1 | 1  |
| <chem>NC=1/N=C(/NCCCC)C=2C(N=1)=CC=CC=2OC/C3=C/C=CC=C3</chem>      | 1.66  | 1 | -1 | 1  |
| <chem>NC=1/N=C(/NCCCC)C=2C(N=1)=CC=CC=2OC/C3=C/C=CC=N3</chem>      | 18.5  | 1 | -1 | 1  |
| <chem>NC=1/N=C(/NCCCC)C=2C(N=1)=CC=CC=2OC/C3=C/C=CN=C3</chem>      | 0.53  | 1 | -1 | 1  |
| <chem>NC=1/N=C(/NCCCC)C=2C(N=1)=CC=CC=2C(=O)NC</chem>              | 0.39  | 1 | 1  | -1 |
| <chem>NC=1/N=C(/NCCCC)C=2C(N=1)=CC=CC=2C(=O)NC(C)(C)[H]</chem>     | 15.55 | 1 | -1 | -1 |
| <chem>NC=1/N=C(/NCCCC)C=2C(N=1)=CC=CC=2C(=O)NC/C3=C/C=CC=C3</chem> | 1.6   | 1 | -1 | -1 |

50. M. Beesu, H. P. Kokatla and S. A. David, *Methods Mol Biol*, 2017, **1494**, 29-44.

51. P. Larson, T. A. Kucaba, Z. Xiong, M. Olin, T. S. Griffith and D. M. Ferguson, *ACS medicinal chemistry letters*, 2017, **8**, 1148-1152.

52. S. Pieters, D. McGowan, F. Herschke, F. Pauwels, B. Stoops, S. Last, W. Embrechts, A. Scholliers, W. Mostmans, K. Van Dijk, B. Van Schoubroeck, T. Thoné, D. De Pooter, G. Fanning, M. L. Rosauero, M. D. Khamlichi, I. Houpis, E. Arnoult, T. H. M. Jonckers and P. Raboisson, *Bioorganic & medicinal chemistry letters*, 2018, **28**, 711-719.

**Table S7.**

The prediction performances of the ECP-Surflex model

| Data set           | Accuracy (%)                              |                                          |                                          |                    |            |             |
|--------------------|-------------------------------------------|------------------------------------------|------------------------------------------|--------------------|------------|-------------|
|                    | Training set                              | Validation set                           | External test set                        | Blind test set (%) |            |             |
| Sample information | 132 samples (61 agonists/71 non-agonists) | 79 samples (36 agonists/43 non-agonists) | 75 samples (52 agonists/23 non-agonists) | 4 agonists         | 8 agonists | 34 agonists |
| Reference          | 9, 24-27, 29, 32-36                       | 9, 24-27, 29, 32-36                      | 22, 23                                   | 50                 | 51         | 52          |
| ECP                | 83.3                                      | 81.0                                     | 80.0                                     | 100.0              | 75.0       | 64.7        |
| Surflex            | 69.7                                      | 72.2                                     | 81.3                                     | 100.0              | 50.0       | 85.3        |
| ECP-Surflex        | 86.9                                      | 86.2                                     | 94.2                                     | 100.0              | 66.7       | 87.0        |
